# Supplementary material for: Mercury and Alzheimer’s Disease: Hg(II) Ions Display Specific Binding to the Amyloid-β Peptide and Hinder Its Fibrillization
Source: Biomolecules. 2019 Dec 27;10(1):44. doi: 10.3390/biom10010044 (PMC7022868; doi:10.3390/biom10010044)
Supplement: Supplementary file 1 [file biomolecules-10-00044-s001.pdf]

# Supplementary Material

## **Mercury and Alzheimer's disease: Hg(II) ions display specific binding to the amyloid- $\beta$ peptide and hinder its fibrillization**

**Cecilia Wallin<sup>1</sup>, Merlin Friedemann<sup>2</sup>, Sabrina B. Sholts<sup>3</sup>, Andra Noormägi<sup>2</sup>, Teodor Svantesson<sup>1</sup>, Jüri Jarvet<sup>1,4</sup>, Per M. Roos<sup>5,6</sup>, Peep Palumaa<sup>2</sup>, Astrid Gräslund<sup>1</sup>, Sebastian K. T. S. Wärmländer<sup>1,\*</sup>**

<sup>1</sup> Department of Biochemistry and Biophysics, Stockholm University, Sweden.

<sup>2</sup> Department of Chemistry and Biotechnology, Tallinn University of Technology, Estonia.

<sup>3</sup> Department of Anthropology, National Museum of Natural History, Smithsonian Institution, Washington, DC, USA.

<sup>4</sup> The National Institute of Chemical Physics and Biophysics, Tallinn, Estonia.

<sup>5</sup> Institute of Environmental Medicine, Karolinska Institutet, Stockholm, Sweden.

<sup>6</sup> Department of Clinical Physiology, Capio St. Göran Hospital, Stockholm, Sweden.

\* Correspondence: seb@dbb.su.se; Tel.: +46 8 162444

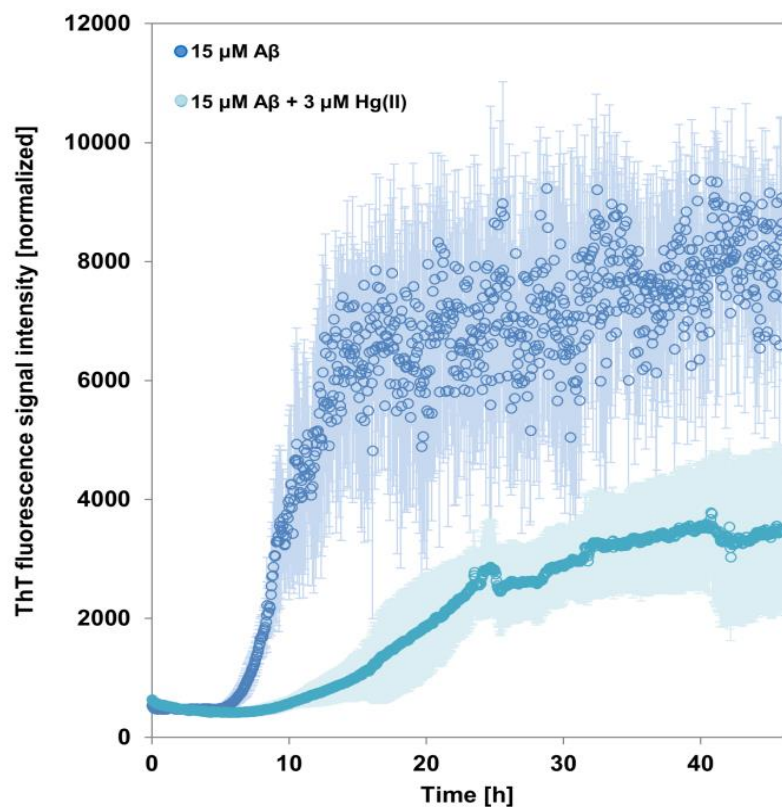

**Figure S1. Amyloid fibril formation of A $\beta$ <sub>40</sub> peptides monitored by Thioflavin T (ThT) aggregation kinetics assay.** ThT fluorescence signal intensity traces of averaged data from samples with 15  $\mu$ M A $\beta$ <sub>40</sub> peptides in 20 mM sodium phosphate buffer pH 7.4 and 40  $\mu$ M ThT incubated in the absence and presence of 3  $\mu$ M Hg(II) ions at +37 °C under quiescent conditions. Standard deviations of four replicates are shown.

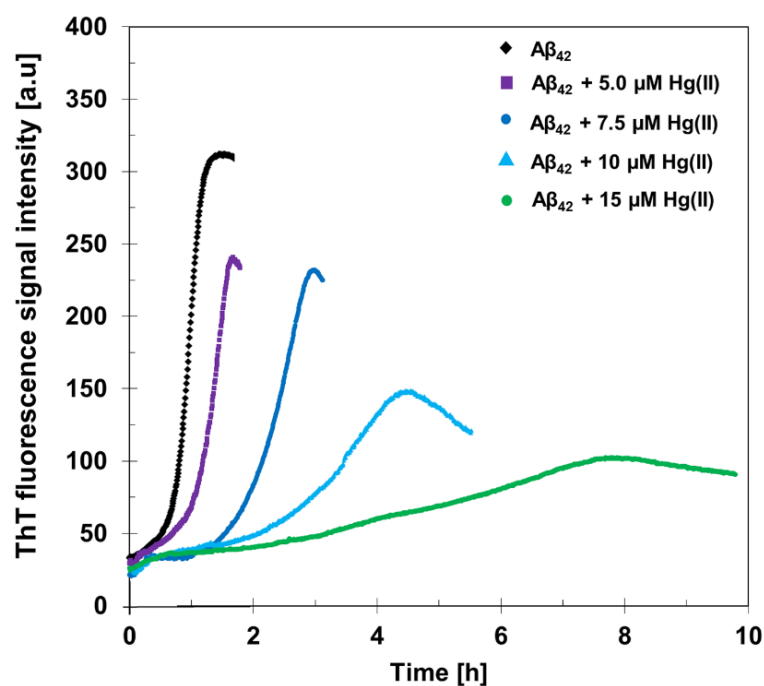

**Figure S2. Amyloid fibril formation of Aβ<sub>42</sub> peptides monitored by Thioflavin T (ThT) aggregation kinetics assay.** ThT fluorescence signal intensity traces from samples with 5 μM Aβ<sub>42</sub> peptides in 20 mM HEPES containing 100 mM NaCl pH 7.3 and 5 μM ThT, incubated in the absence and presence of 5-15 μM Hg(NO<sub>3</sub>)<sub>2</sub> at +45 °C incubated with magnetic stirring. One series of Aβ<sub>42</sub> peptides in the presence of increasing concentrations of Hg(II) ions is shown.

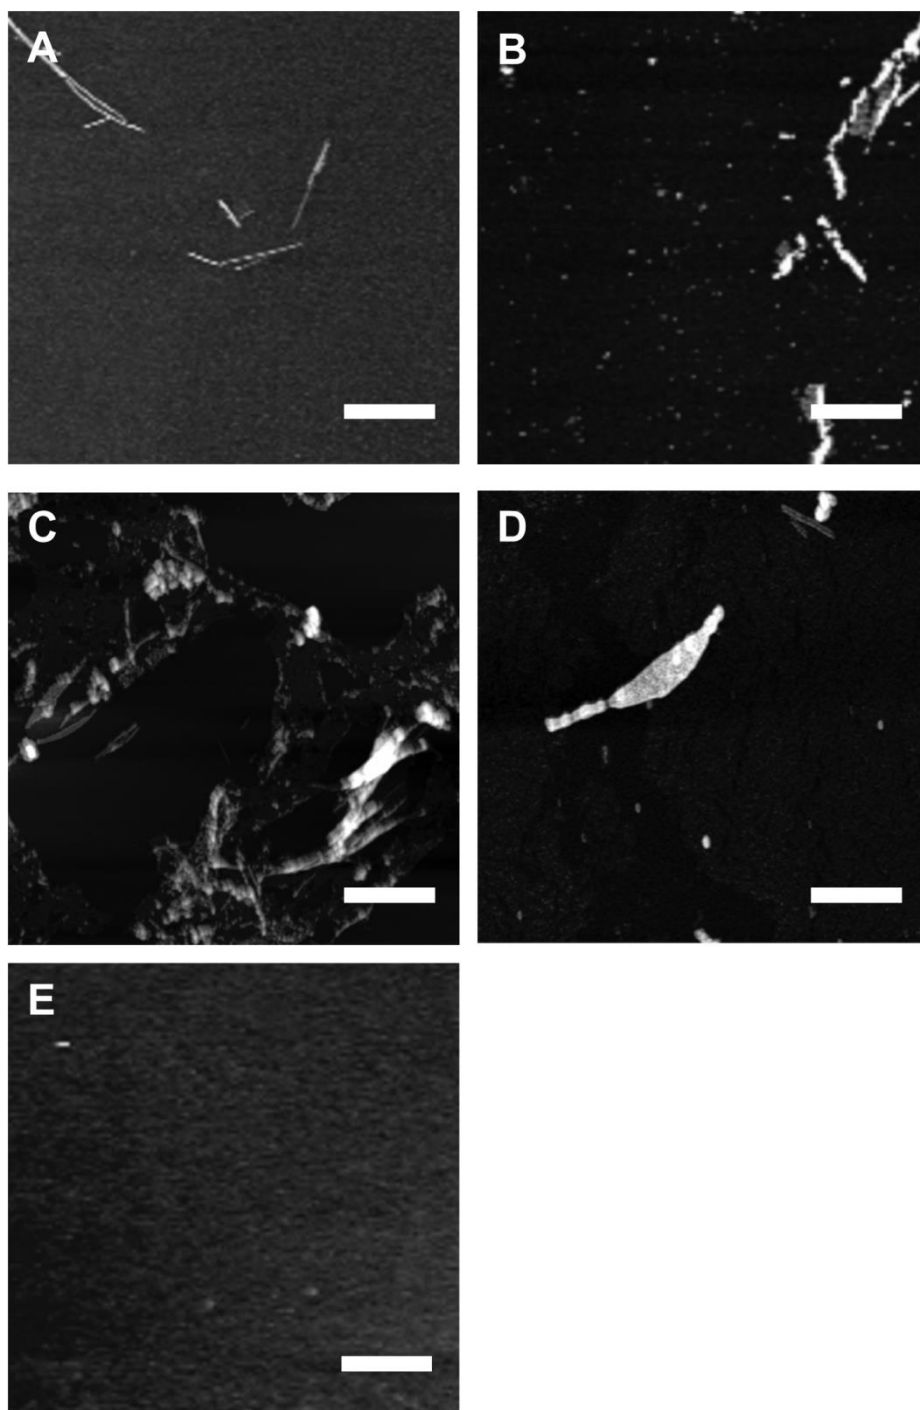

**Figure S3. Solid state AFM imaging of fibril formation and morphology.** (A-D) Topographical images of samples taken from the end of the ThT aggregation experiment (~45 h) in Figure 1. (A) shows 15  $\mu$ M aggregated A $\beta$  peptides alone, (B) A $\beta$  + 0.8  $\mu$ M Hg(II) ions, (C) A $\beta$  + 1.5  $\mu$ M Hg(II) ions, (D) A $\beta$  + 3.0  $\mu$ M Hg(II) ions, and (E) A $\beta$  + 15  $\mu$ M Hg(II) ions. The scale bars represent 1  $\mu$ m.

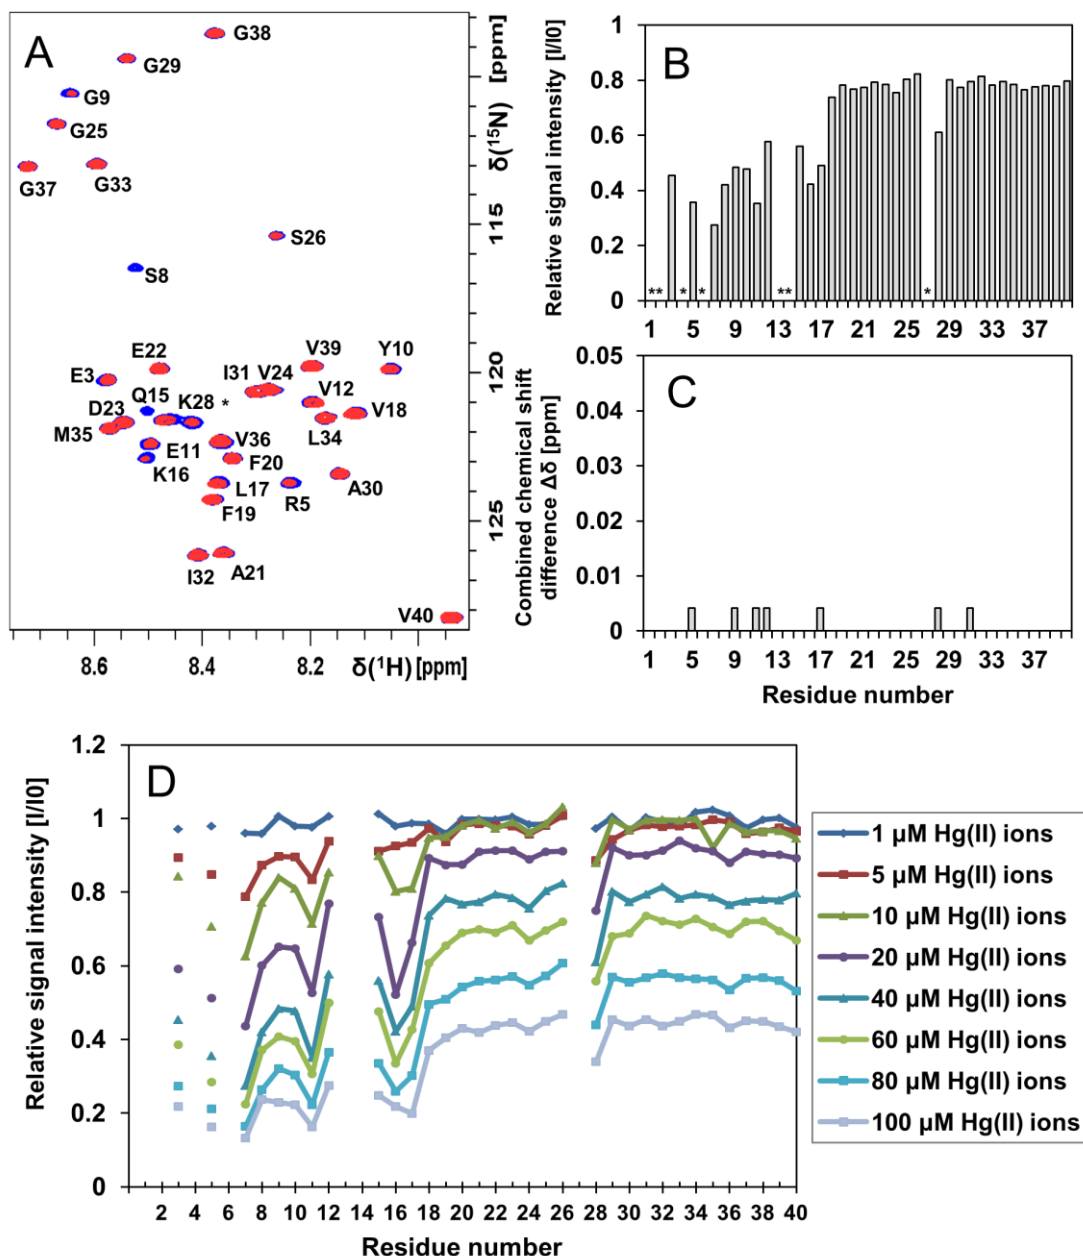

**Figure S4.** 2D NMR  $^1H$ - $^{15}N$ -HSQC titration experiments showing  $A\beta_{40}$  residue-specific perturbations from  $Hg(II)$  ions in buffer. (A) 700 MHz  $^1H$ - $^{15}N$ -HSQC spectra of 84  $\mu M$  monomeric  $^{13}C$ - $^{15}N$ -labeled  $A\beta_{40}$  peptides alone (blue) and in the presence of 40  $\mu M$   $Hg(II)$  ions (red) in 20 mM sodium phosphate buffer pH 7.35 at +5  $^{\circ}C$ . In (B), relative signal intensities determined from the amplitude of the amide crosspeaks in the two spectra in (A) are shown. Combined chemical shift differences from the spectra in (A) are shown in (C). The relative signal intensities determined from the amplitude of the amide crosspeaks for the whole  $Hg(II)$  ions titration series are shown in (D). Residues assigned with a \* are not accurately determined or observed because of too fast exchange with the solvent or due to spectral overlap.

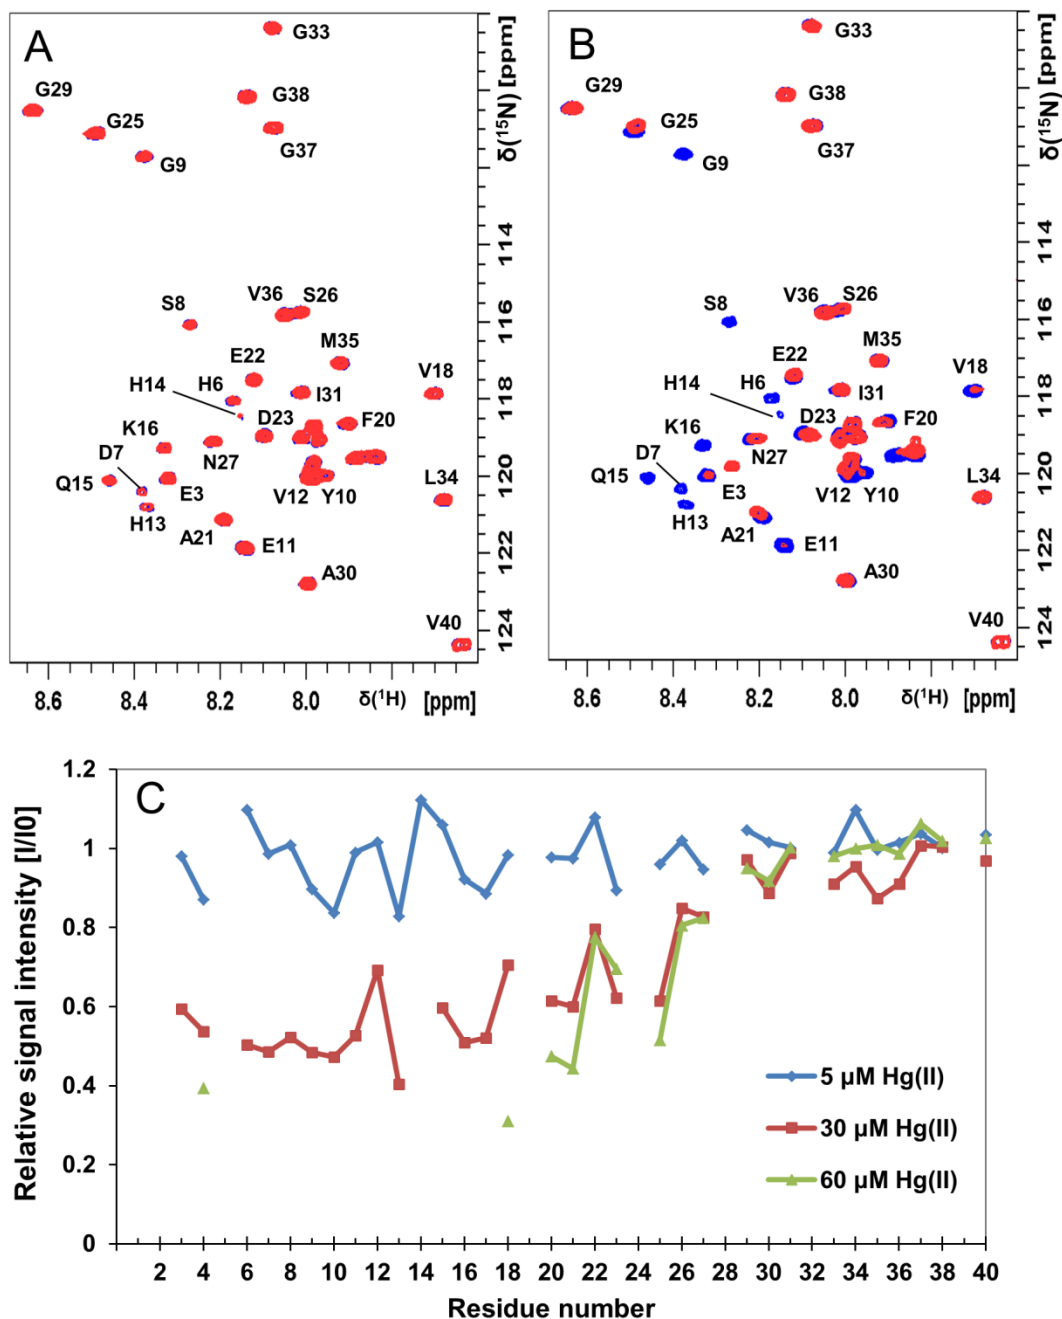

**Figure S5.** 2D NMR  $^1\text{H}$ - $^{15}\text{N}$ -HSQC titration experiments showing  $\text{A}\beta_{40}$  residue-specific perturbations from  $\text{Hg(II)}$  ions in SDS micelles. 500 MHz  $^1\text{H}$ - $^{15}\text{N}$ -HSQC spectra of 84  $\mu\text{M}$  monomeric  $^{15}\text{N}$ -labeled  $\text{A}\beta_{40}$  peptides (blue) in 20 mM sodium phosphate buffer pH 7.35 and 50 mM SDS at +25  $^{\circ}\text{C}$ . Red amide crosspeaks corresponds to 84  $\mu\text{M}$   $^{15}\text{N}$ -labeled  $\text{A}\beta_{40}$  peptides in the presence of 5  $\mu\text{M}$   $\text{Hg(II)}$  ions (A) or 60  $\mu\text{M}$   $\text{Hg(II)}$  ions (B). In (C) the relative signal intensities determined from the amplitude of the amide crosspeaks for the whole  $\text{Hg(II)}$  ions titration series are shown.
